# Supplementary material for: Teaching climate risk: a pilot training for tertiary students and practitioners in Brazil
Source: Copernicus journal article supplement (doi:10.5194/gc-2021-23), 2021-08-25
Supplement: Supplementary file 2 [file gc-2021-23-supplement.zip]

Set of maps for the working groups: Floods

**CLASSE:**

**JUSTIFICATIVA:**

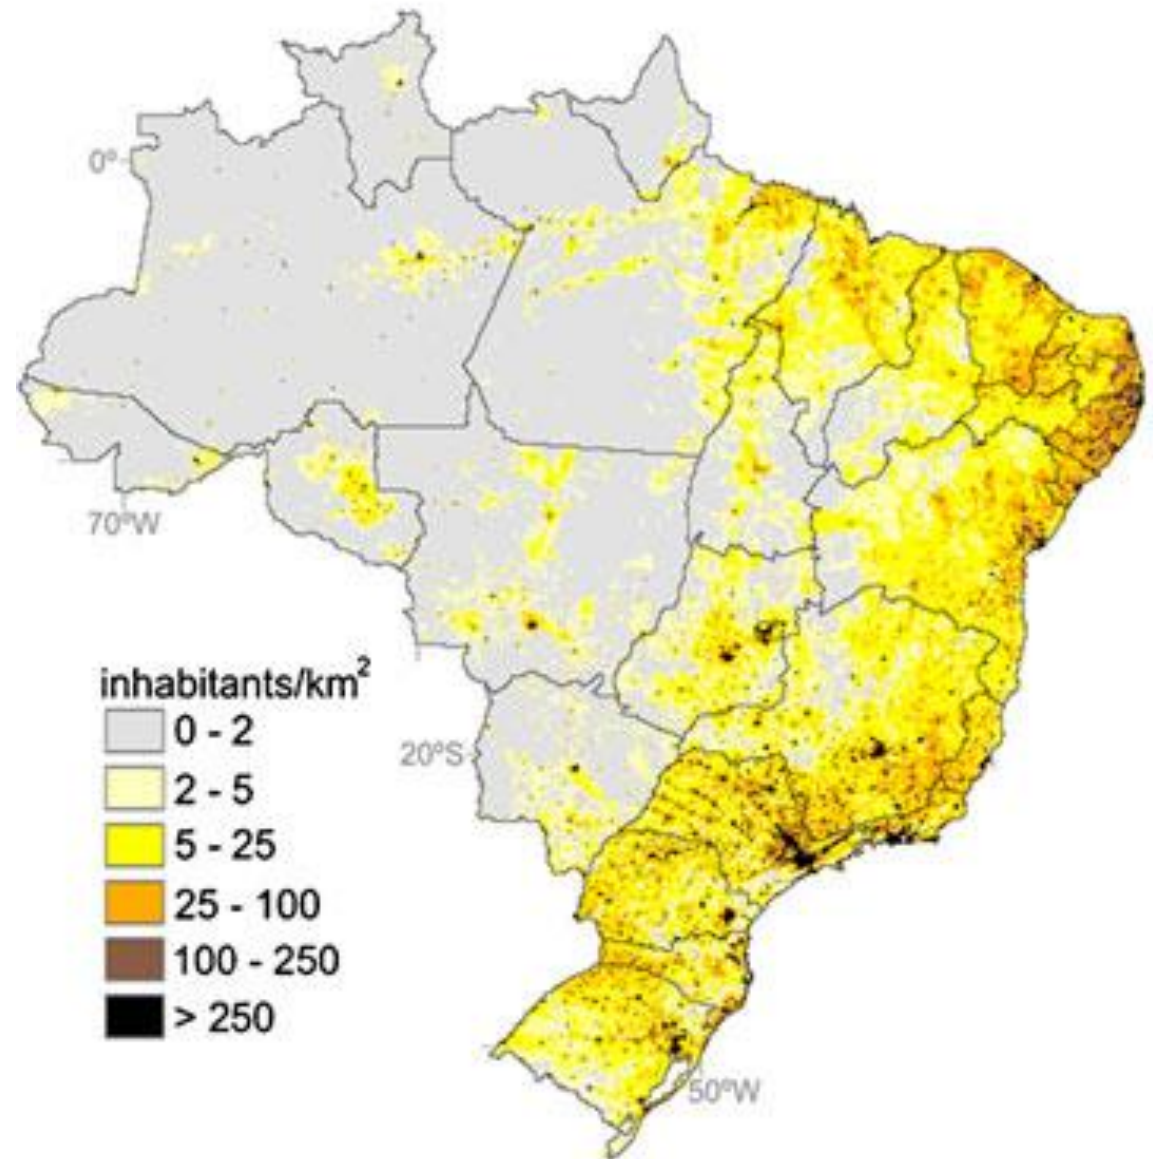

Figure S1. Population density of the year 2000 (adapted from Torres et al., 2012).

**CLASSE:**

**JUSTIFICATIVA:**

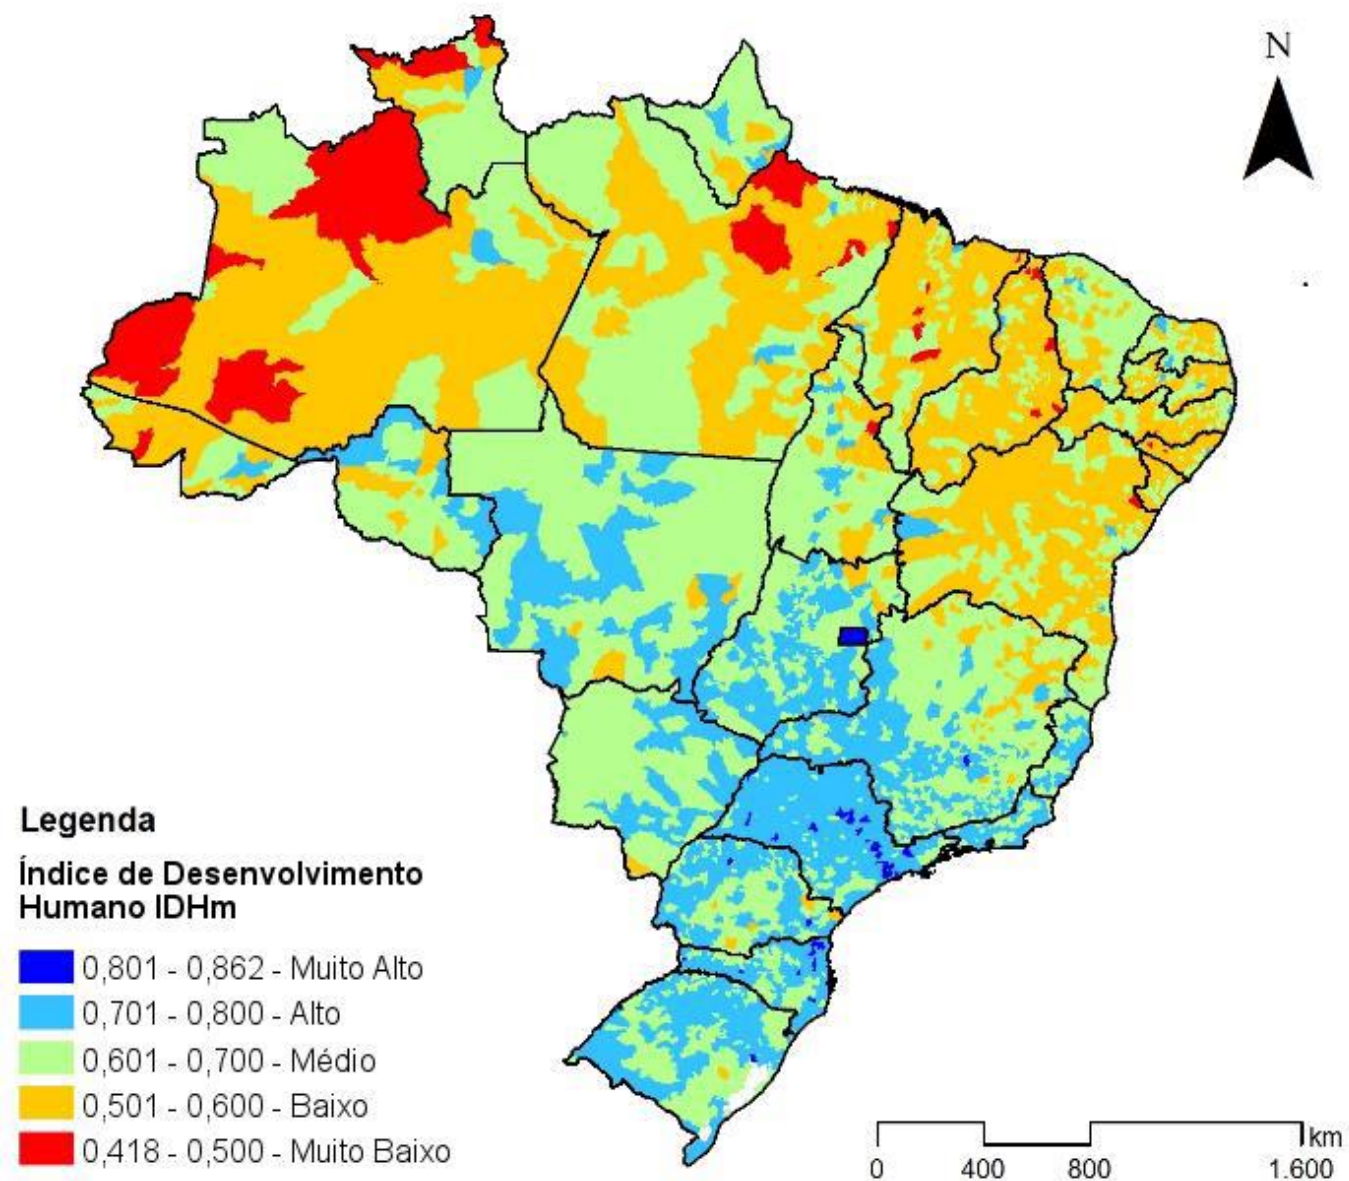

**Figure S2. Human Development Index Map (adapted from MMA, 2017).**

**CLASSE:**

**JUSTIFICATIVA:**

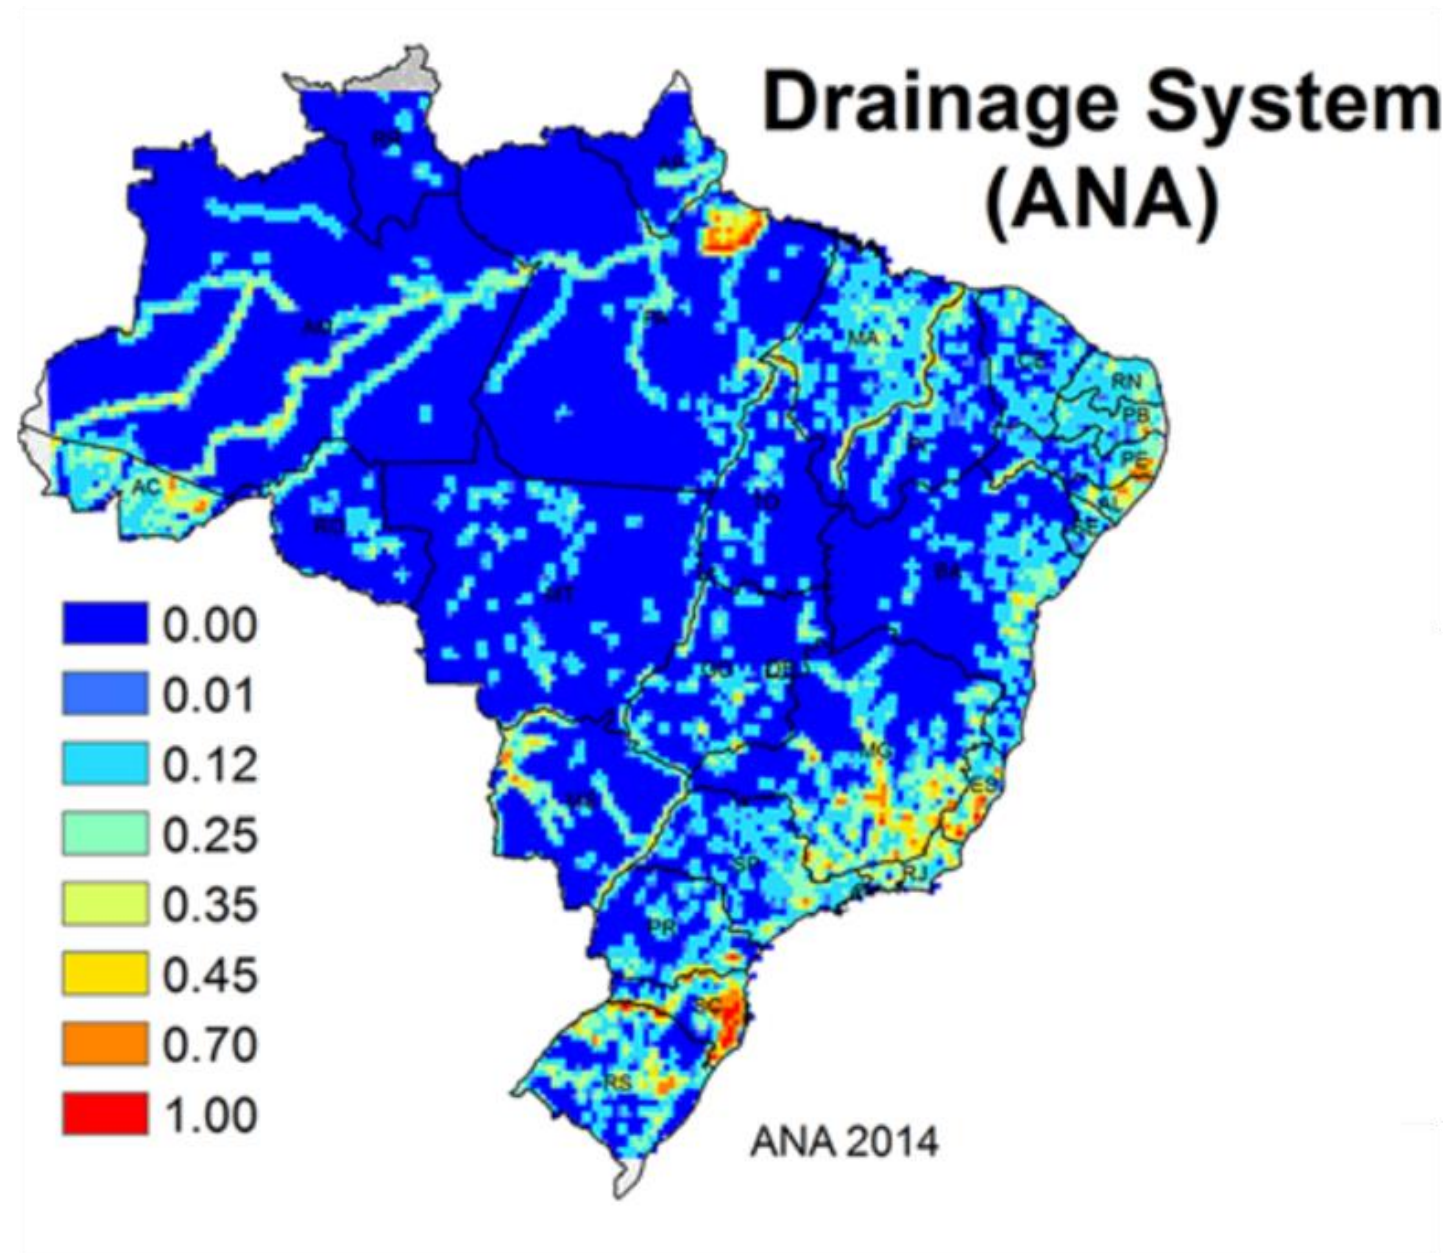

Figure S3. Drainage system (adapted from Debortoli et al., 2017).



**CLASSE:**

**JUSTIFICATIVA:**

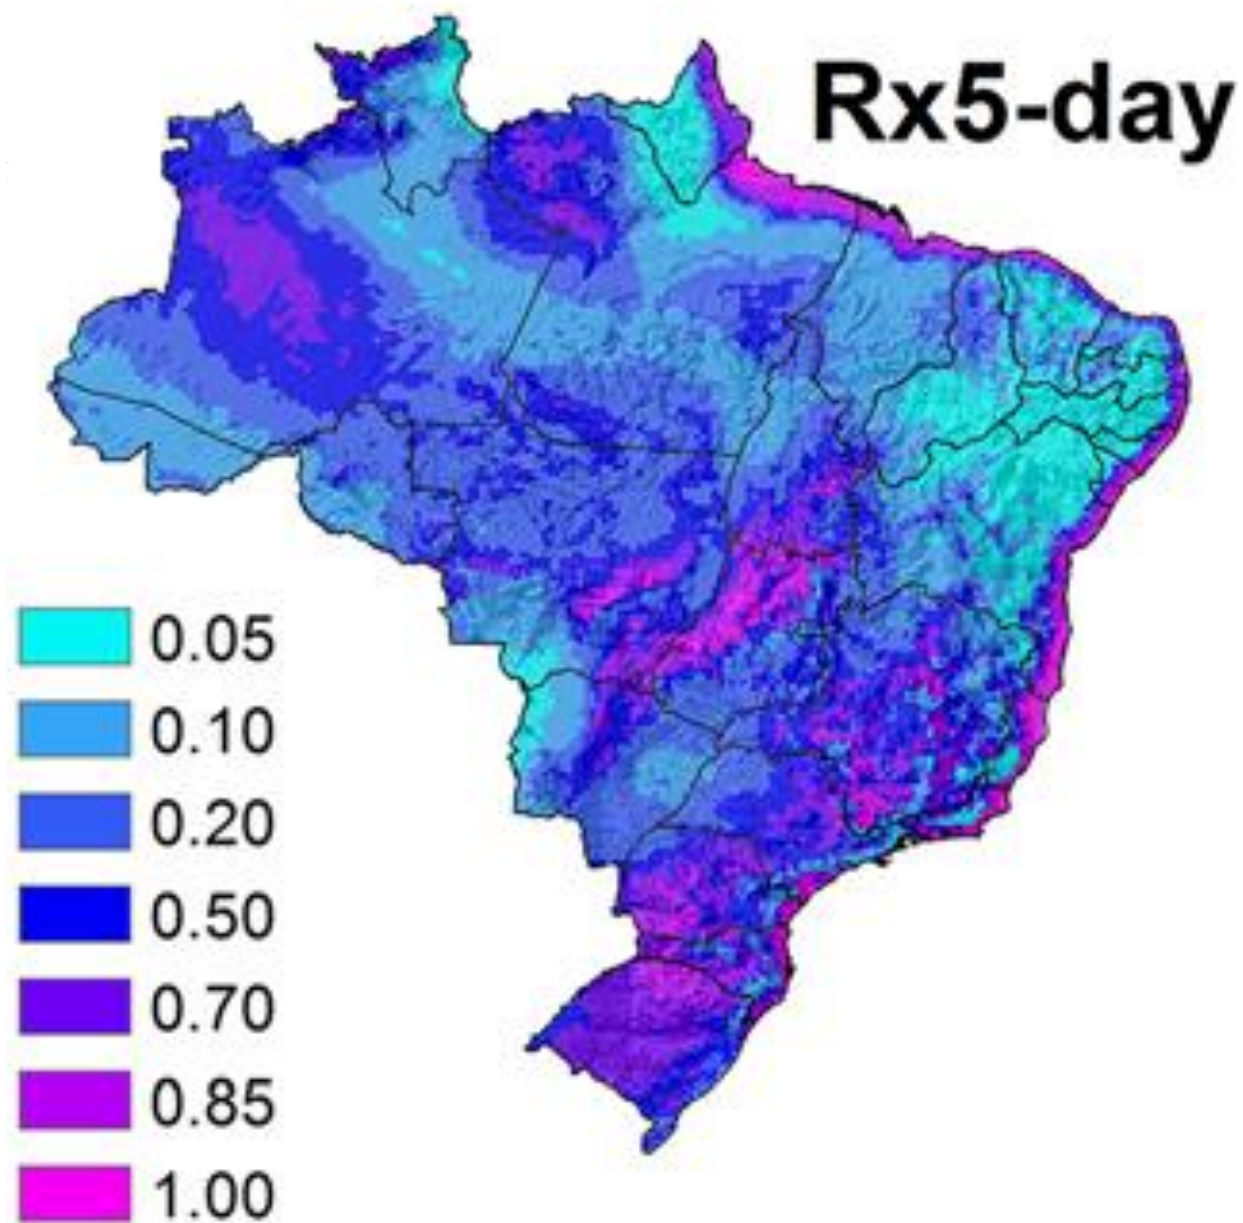

Figure S4. maximum consecutive 5-day precipitation (normalized) for the period of 1961-1990 (adapted from Debortoli et al., 2017).

**Set of maps for the working group: Landslides**

**CLASSE:**

**JUSTIFICATIVA:**

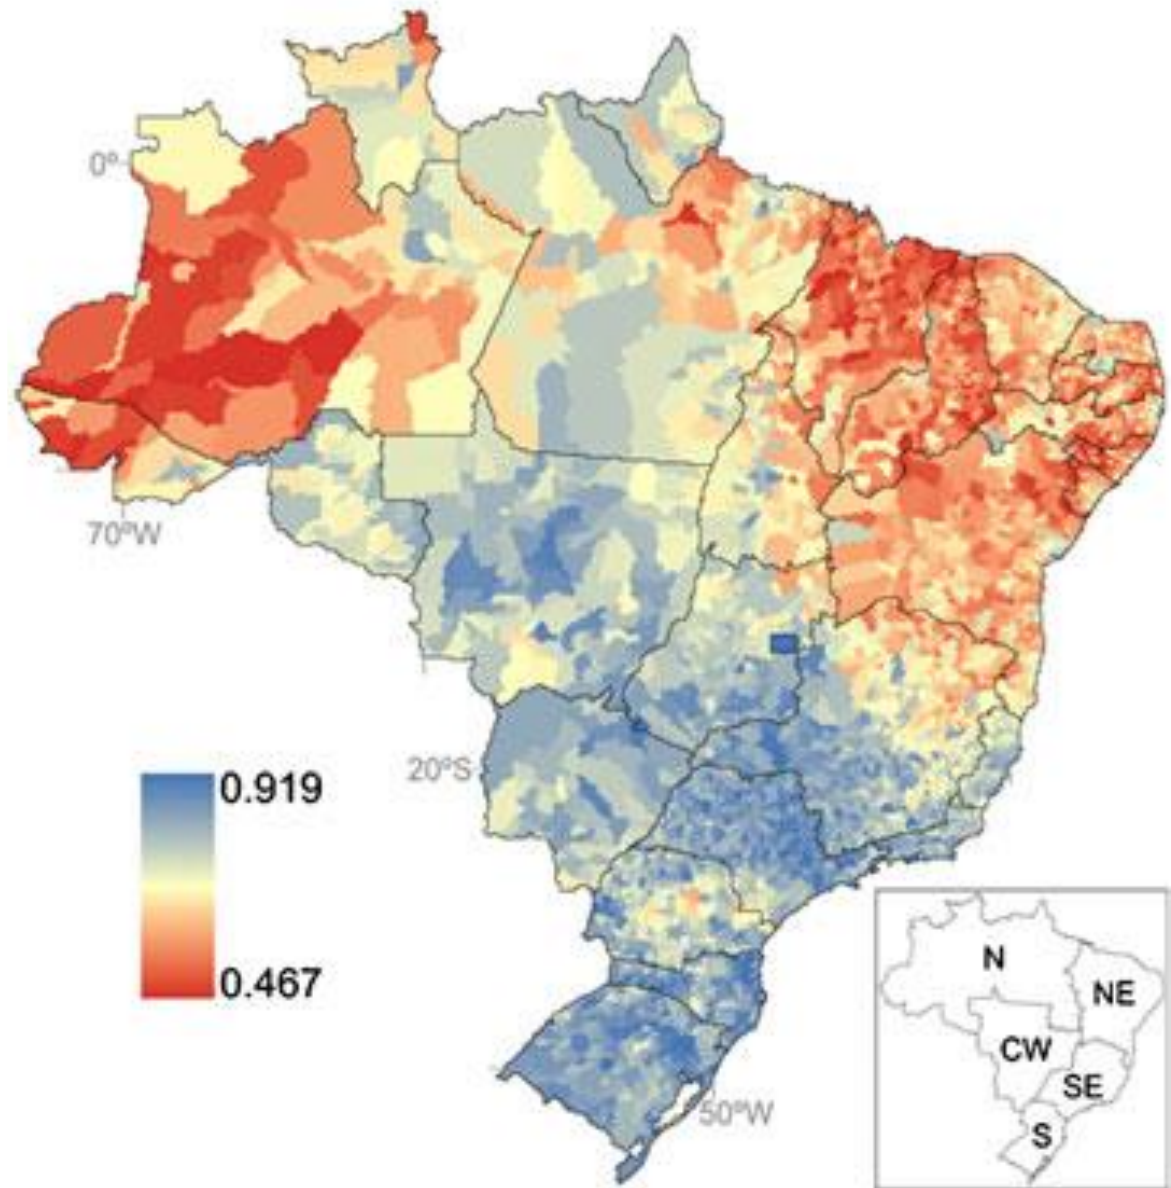

Figure S5. Human Development Index Map (adapted from Torres et al., 2012).

**CLASSE:**

**JUSTIFICATIVA:**

**Cartograma 1 - Municípios com Conselho Municipal de Habitação - 2017**

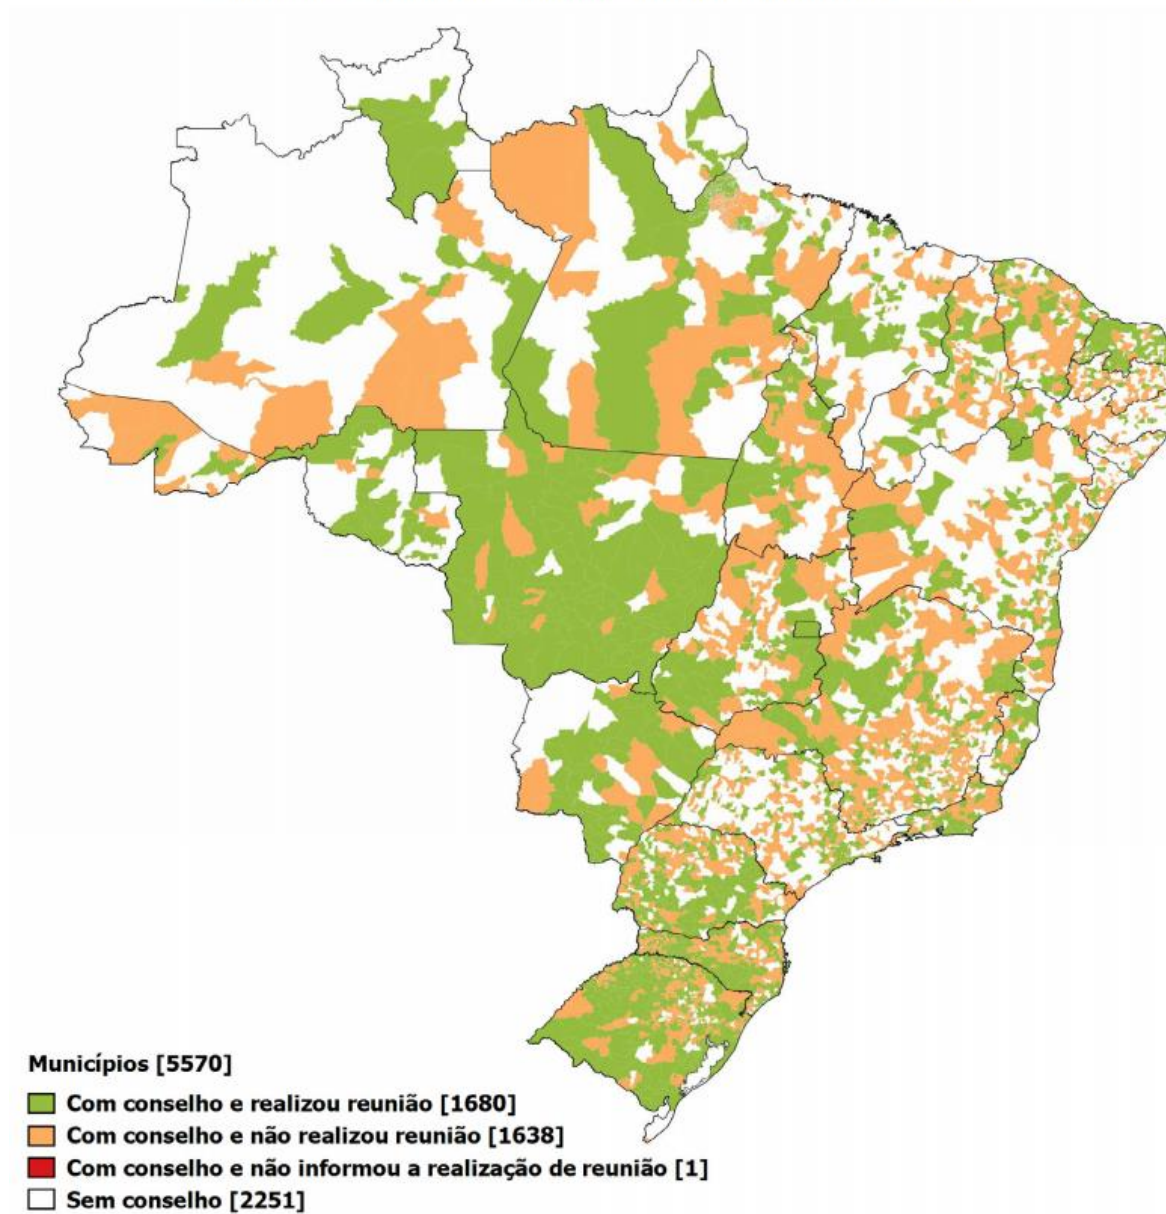

Figure S6. Municipalities with Municipal Housing Council (adapted from IBGE, 2017).



**CLASSE:**

**JUSTIFICATIVA:**

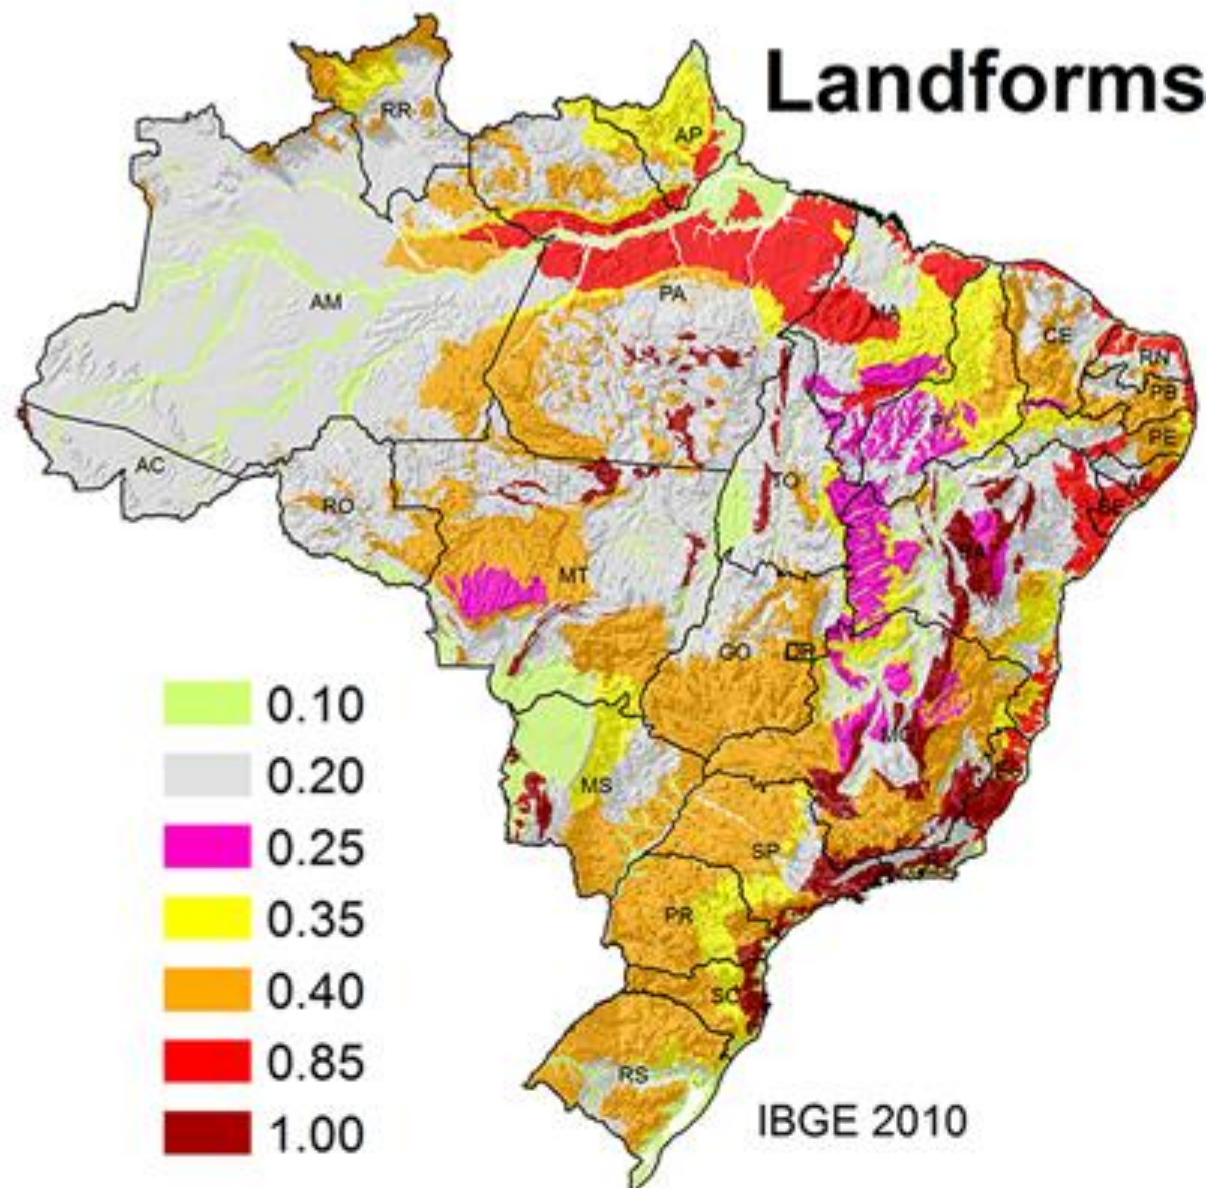

Figure S7. Landforms (adapted from Debortoli et al., 2017).

**CLASSE:**

**JUSTIFICATIVA:**

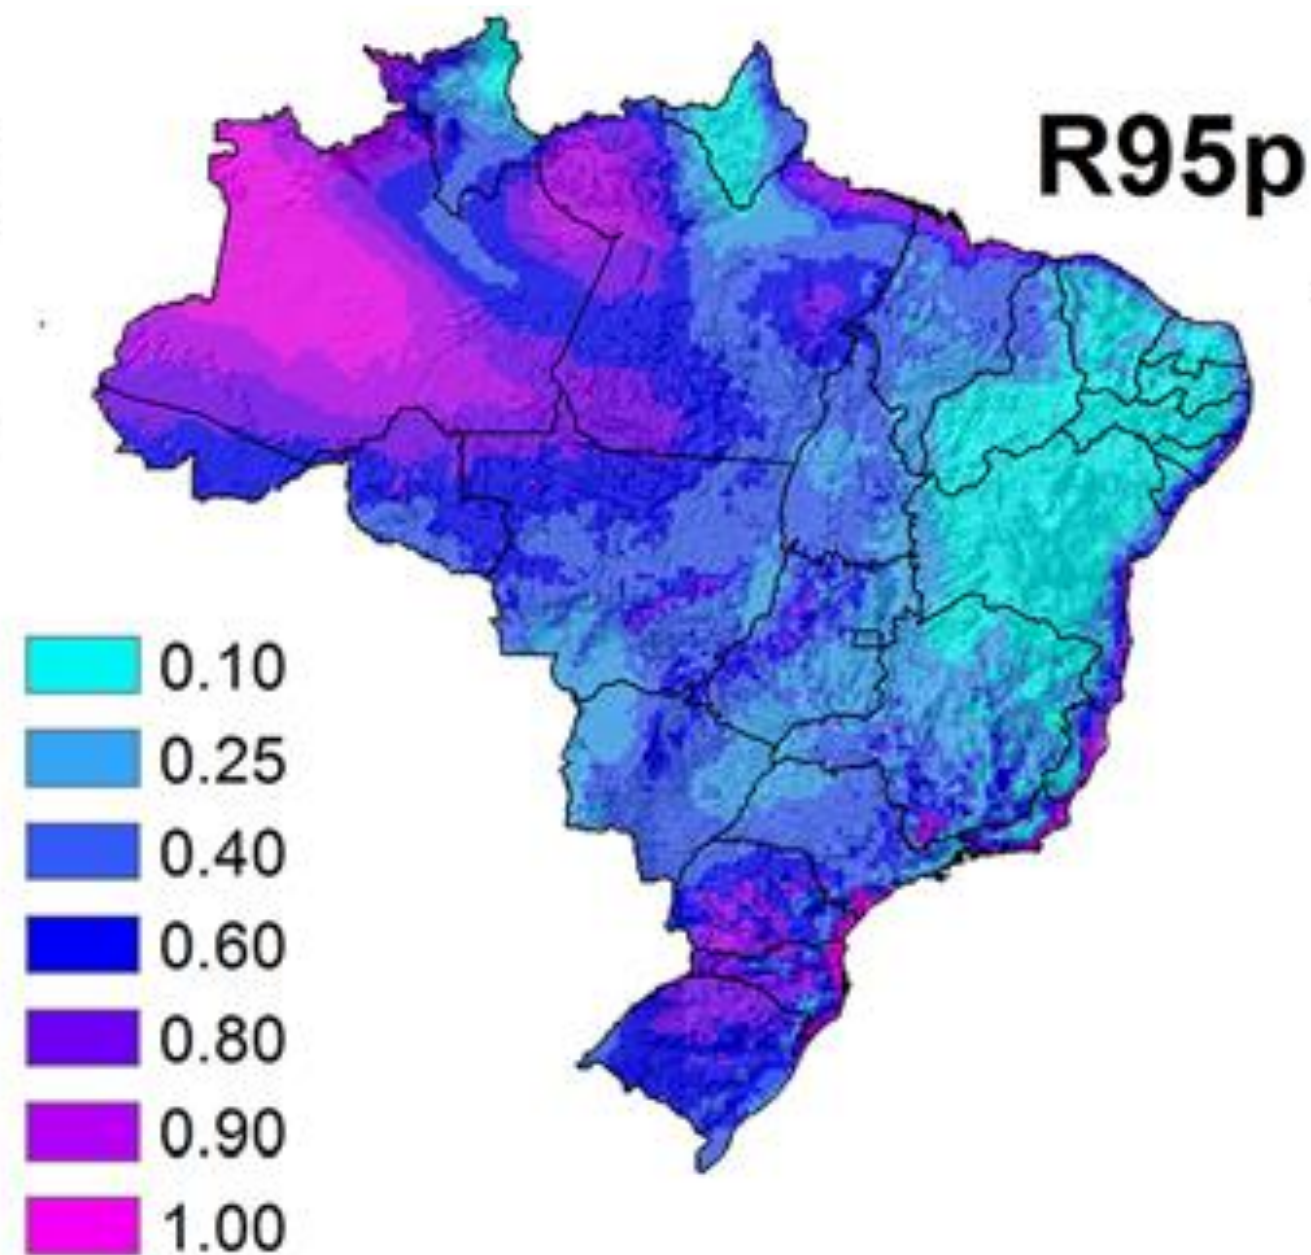

Figure S8. Annual total precipitation when precipitation > 95th percentil (normalized) for the period of 1961-1990 (adapted from Debortoli et al., 2017).

Set of maps for the working group: Water Scarcity

**CLASSE:**

**JUSTIFICATIVA:**

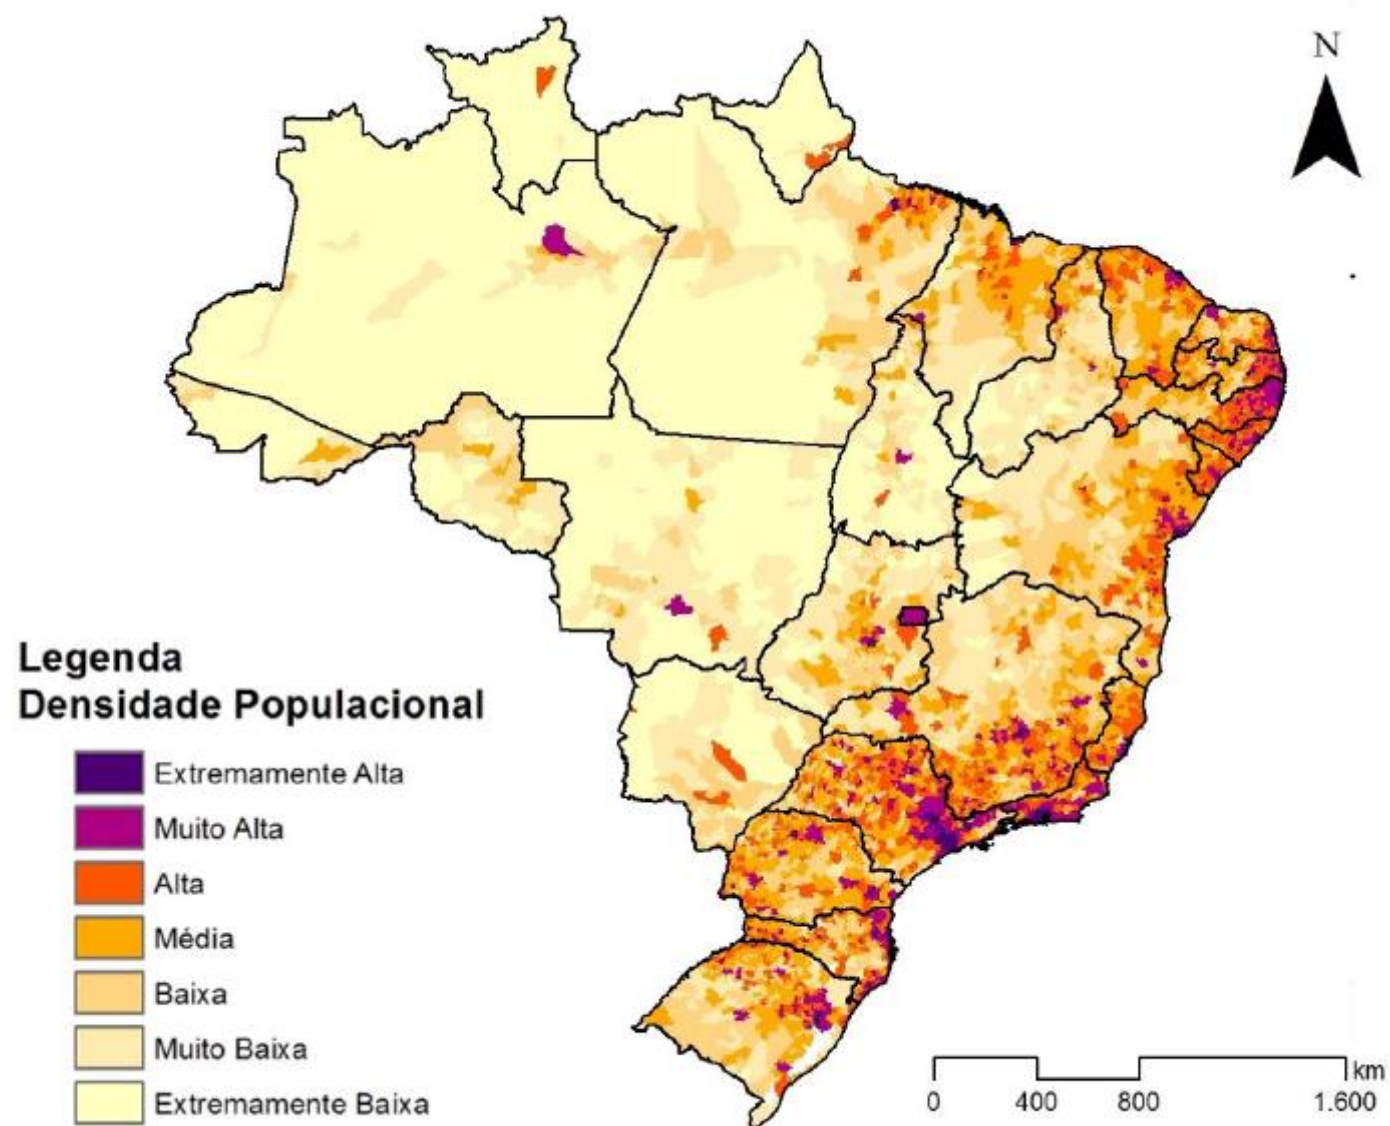

Figure S9. Population density of 2010 (adapted from MMA, 2017).



**CLASSE:**

**JUSTIFICATIVA:**

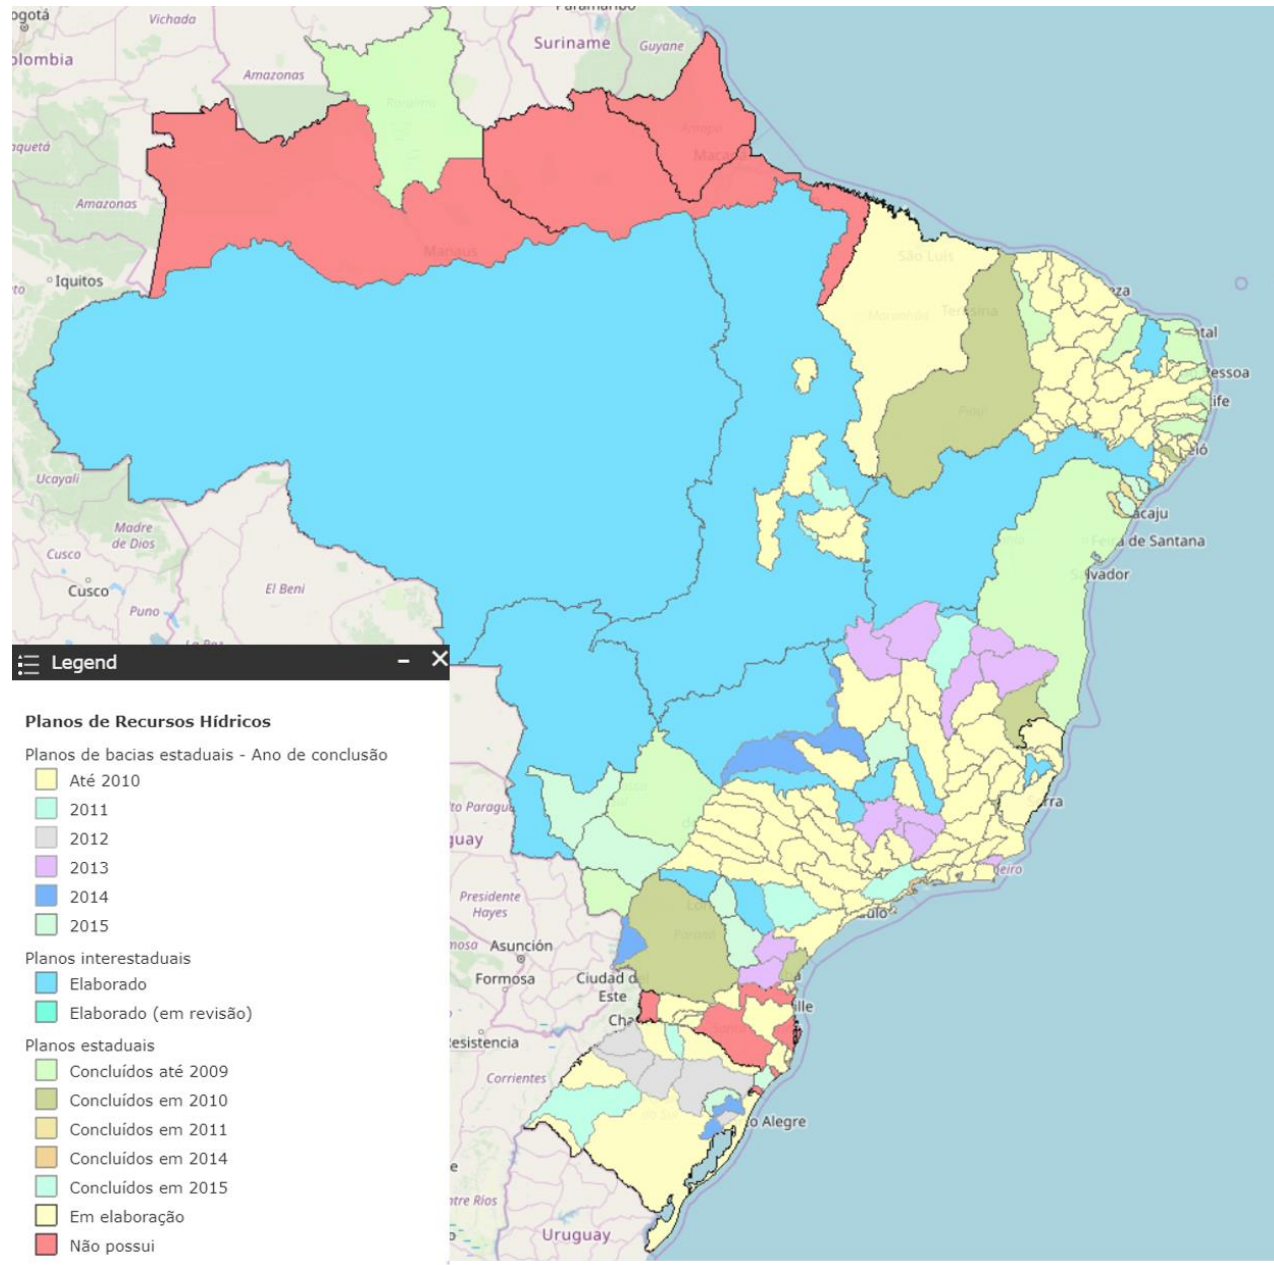

**Figure S10. Stage of implementation of the water resources planning (adapted from Planos de Recursos Hídricos, 2020).**

**CLASSE:**

**JUSTIFICATIVA:**

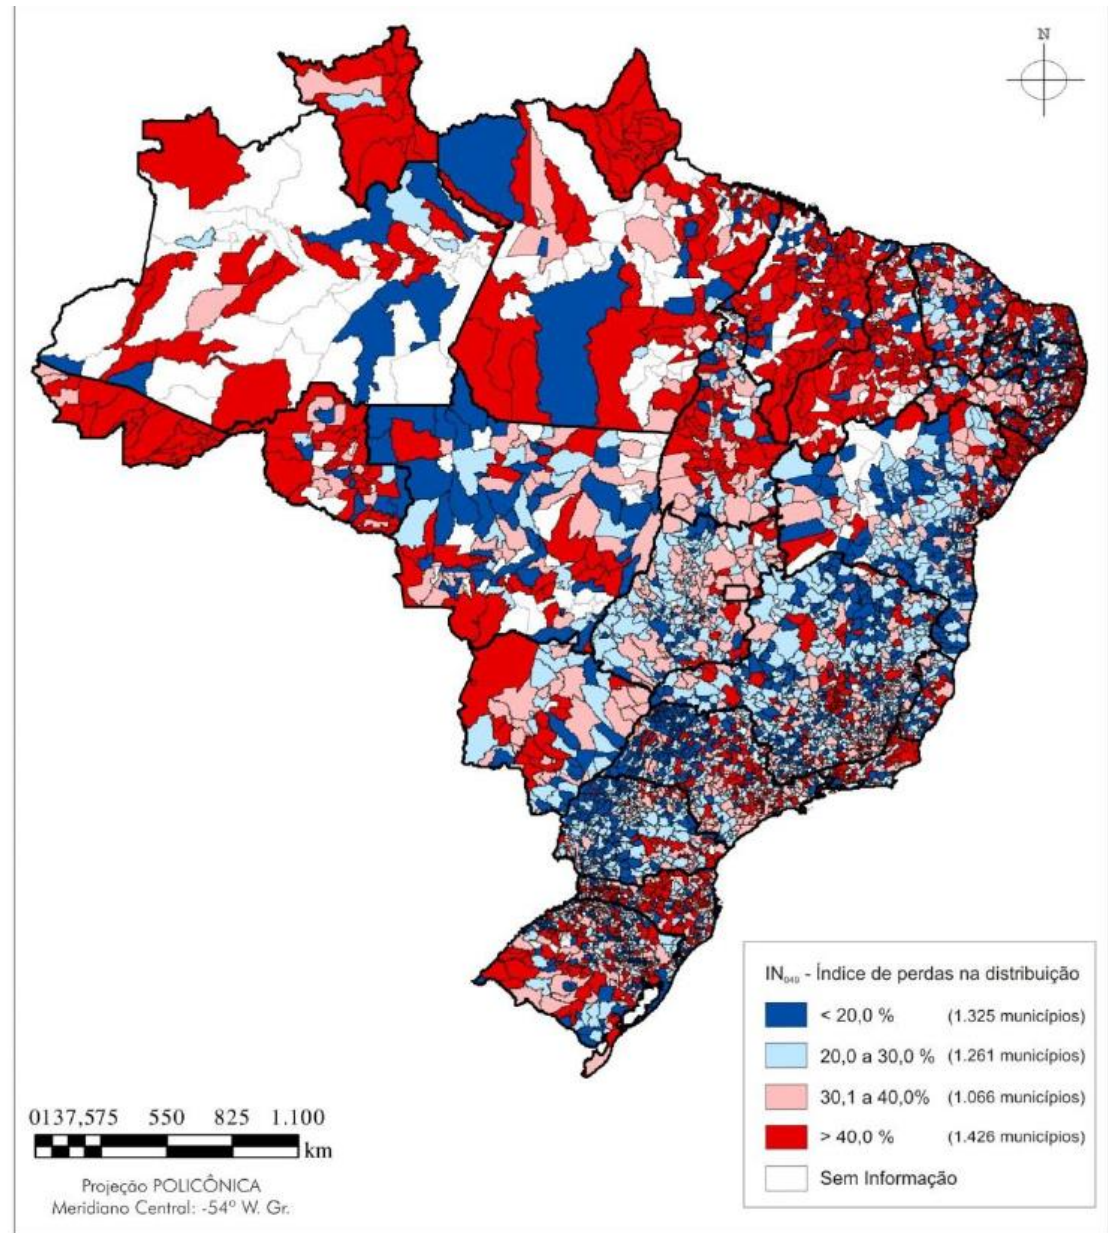

Fonte: Malha municipal digital do Brasil, Base de Informações Municipais 4. IBGE, 2003. Dados: SNIS, 2017.

**Figure S11. Water distribution loss index (adapted from Brasil, 2017).**

**CLASSE:**

**JUSTIFICATIVA:**

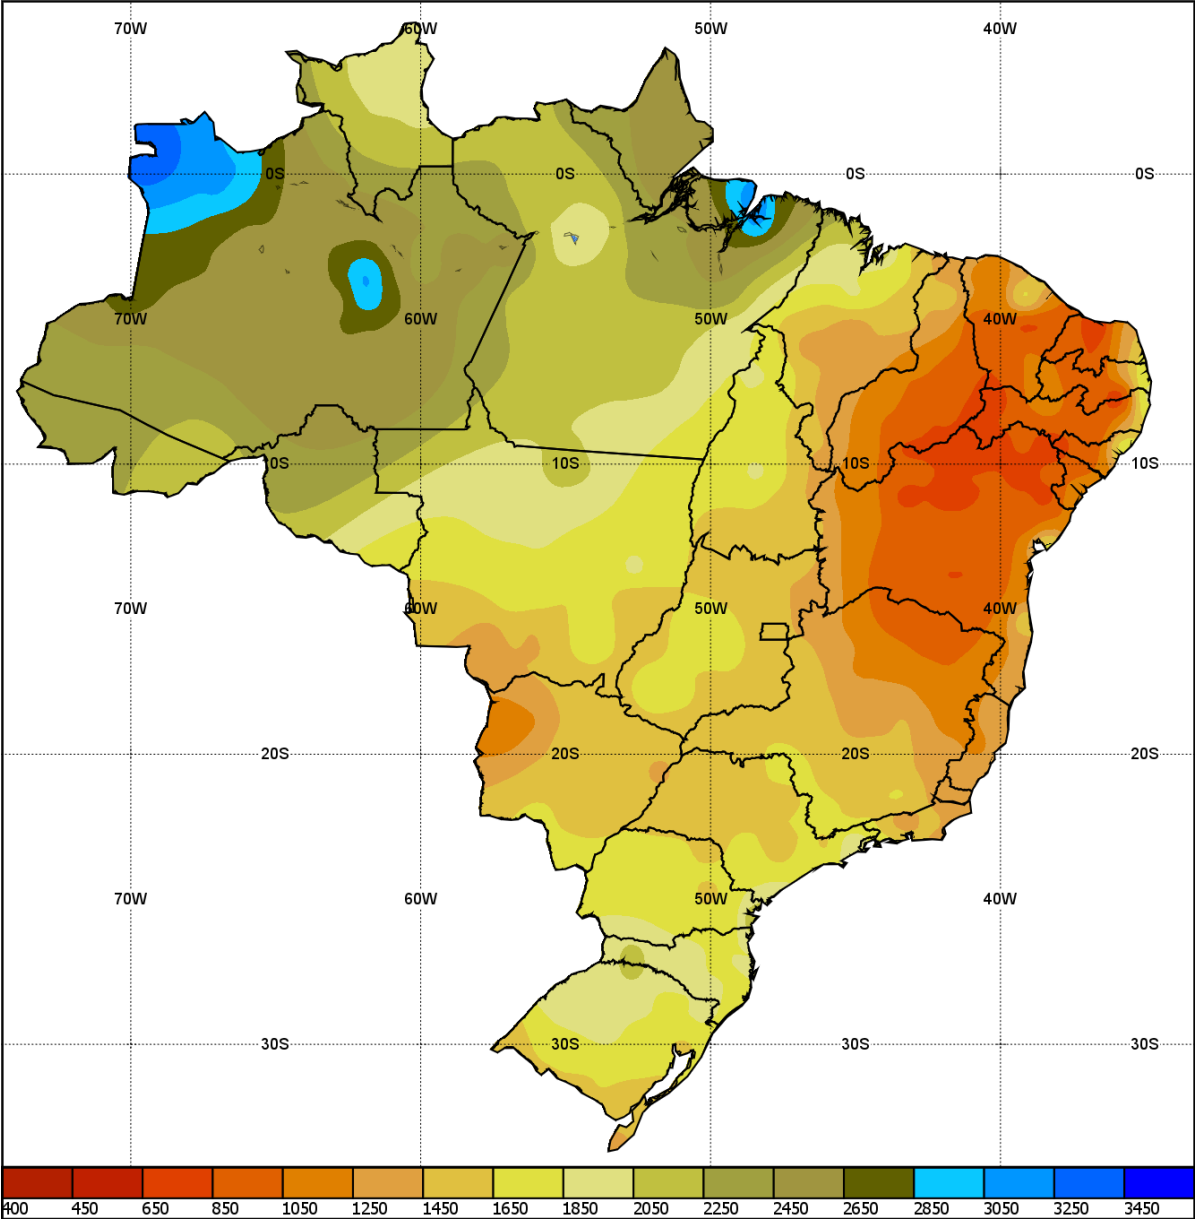

Figure S12. Annual rainfall for the period of 1981-2010 (Normais climatológicas do Brasil, 2020).

**Set of maps for the working group: Agricultural Droughts**



CLASSE:

JUSTIFICATIVA:

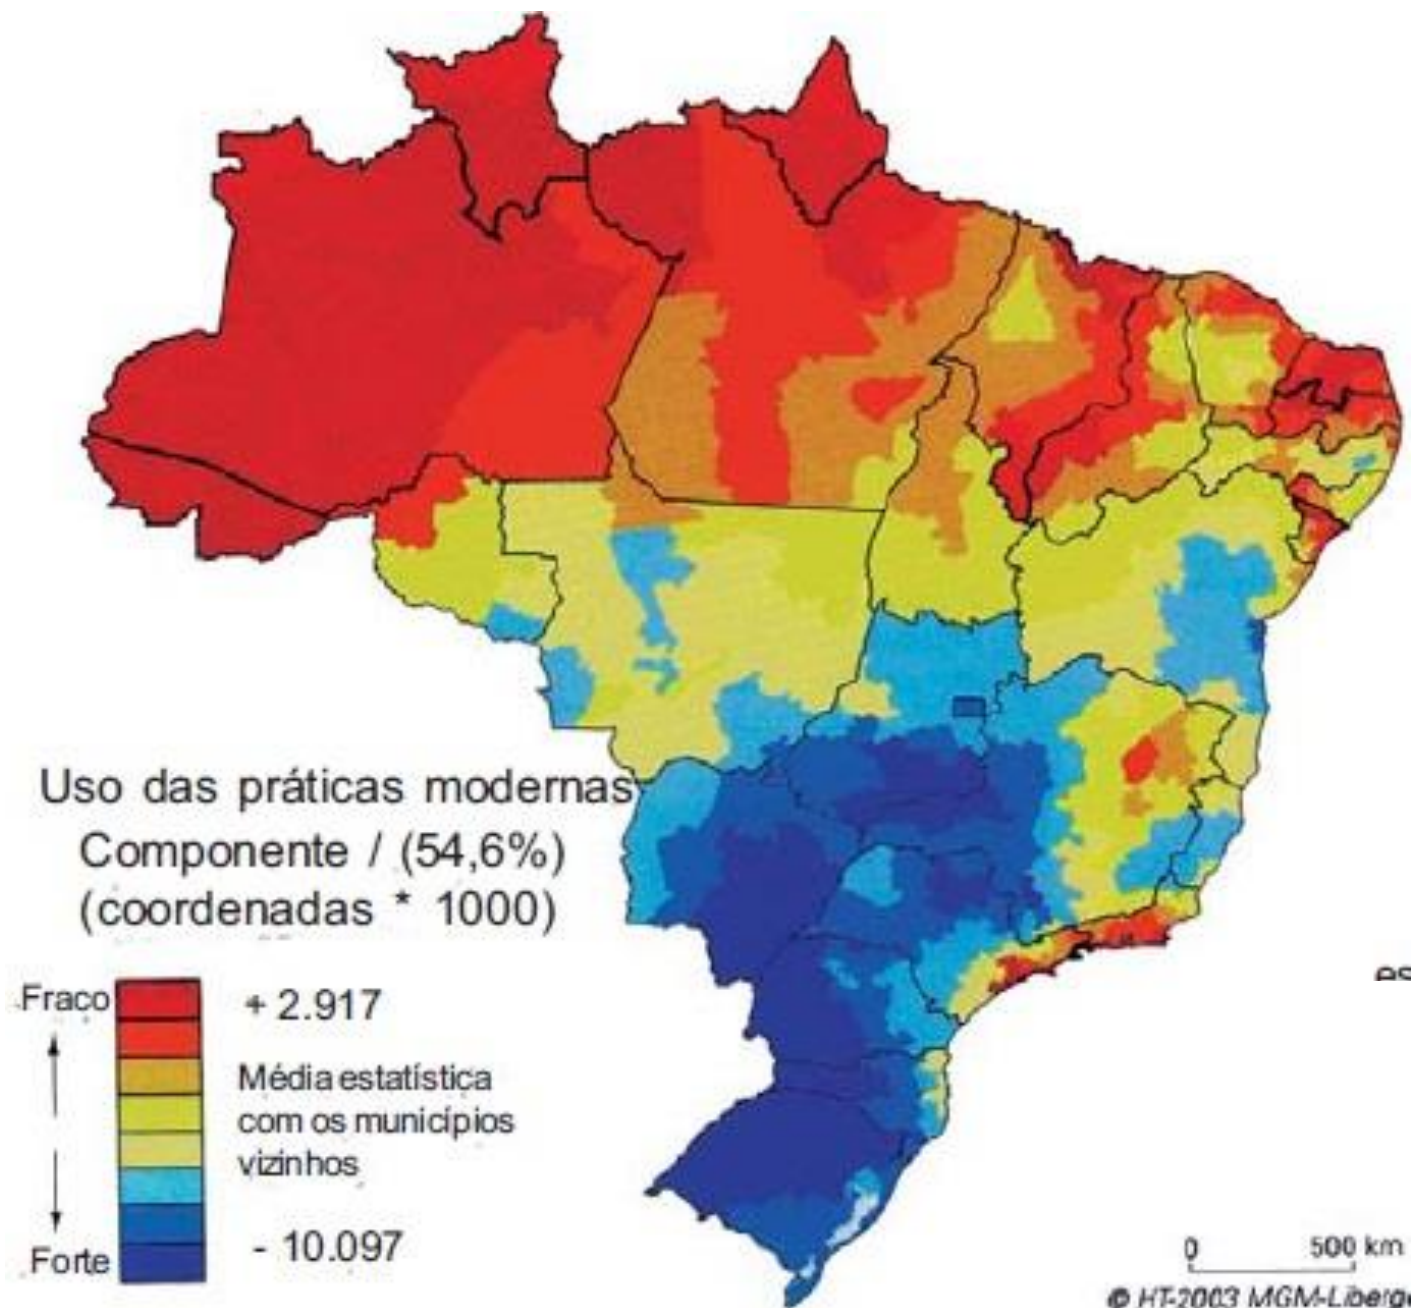

Figure S13. Use of modern agricultural practices (adapted from Théry e Mello 2008).

CLASSE:

JUSTIFICATIVA:

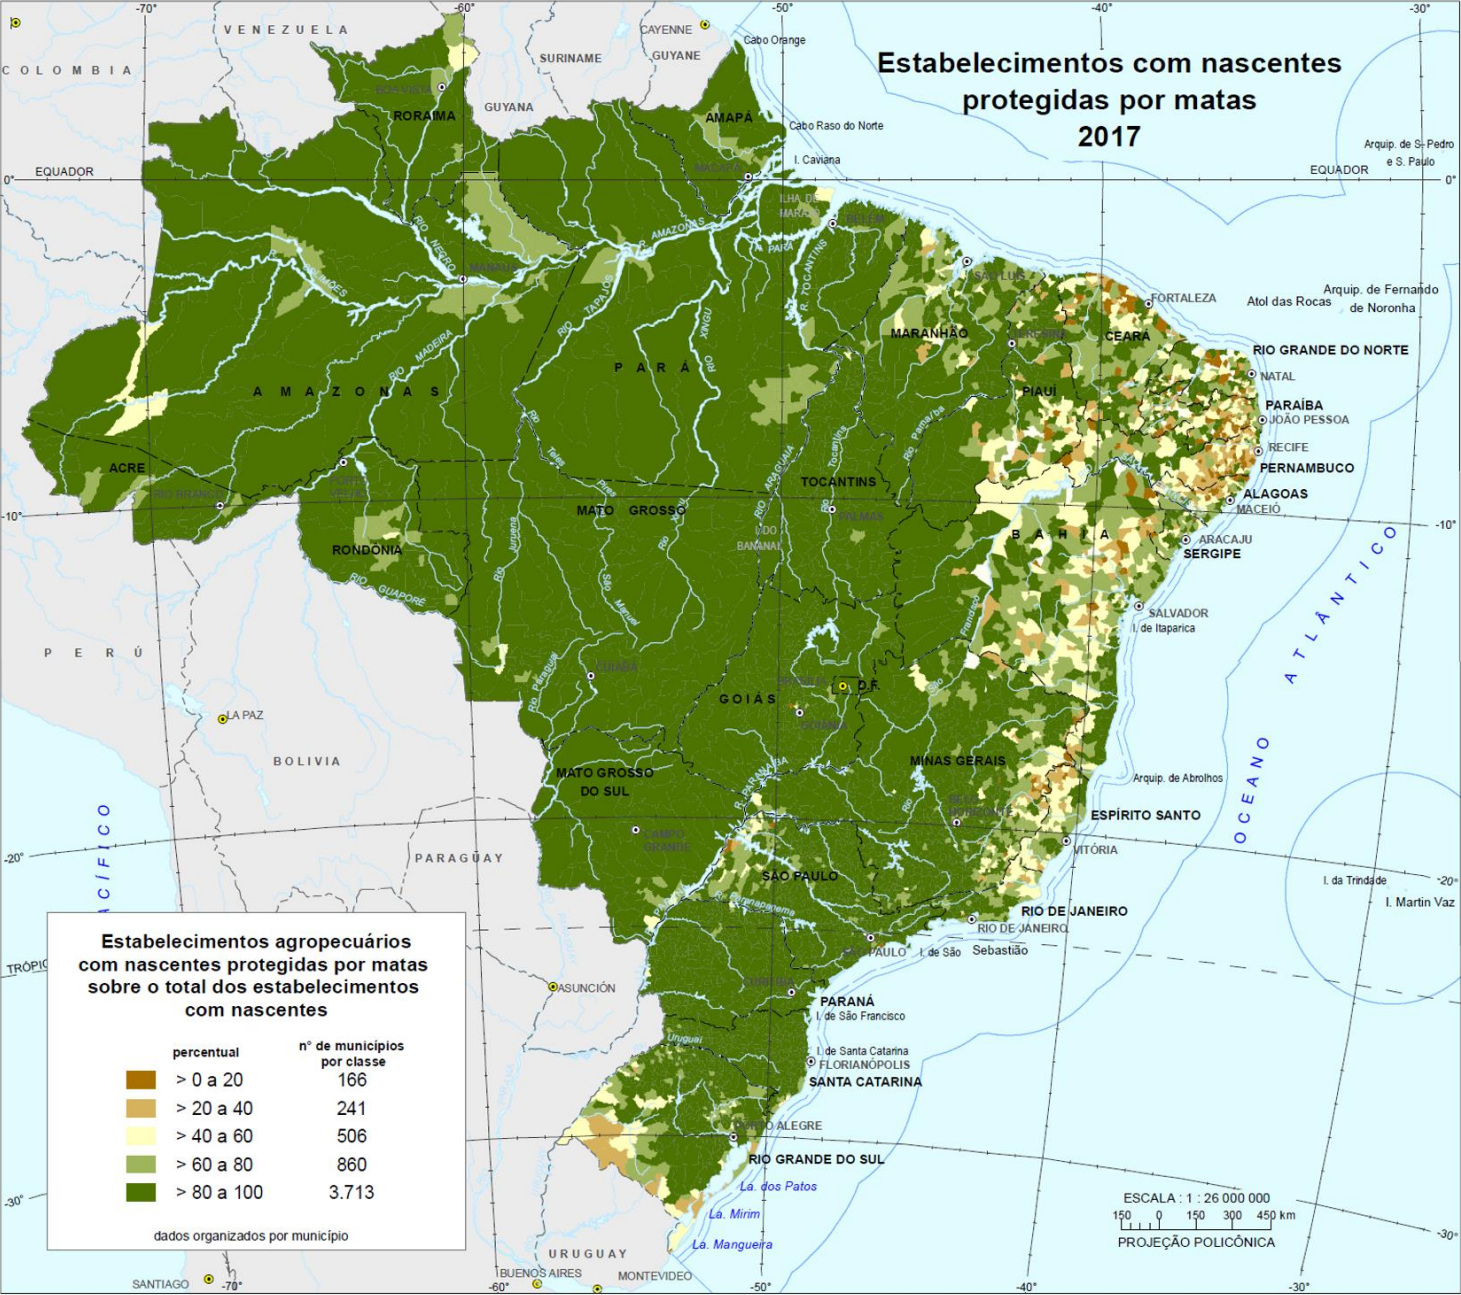

Figure S14. Properties with protected water springs (adapted from IBGE 2019).



CLASSE:

JUSTIFICATIVA:

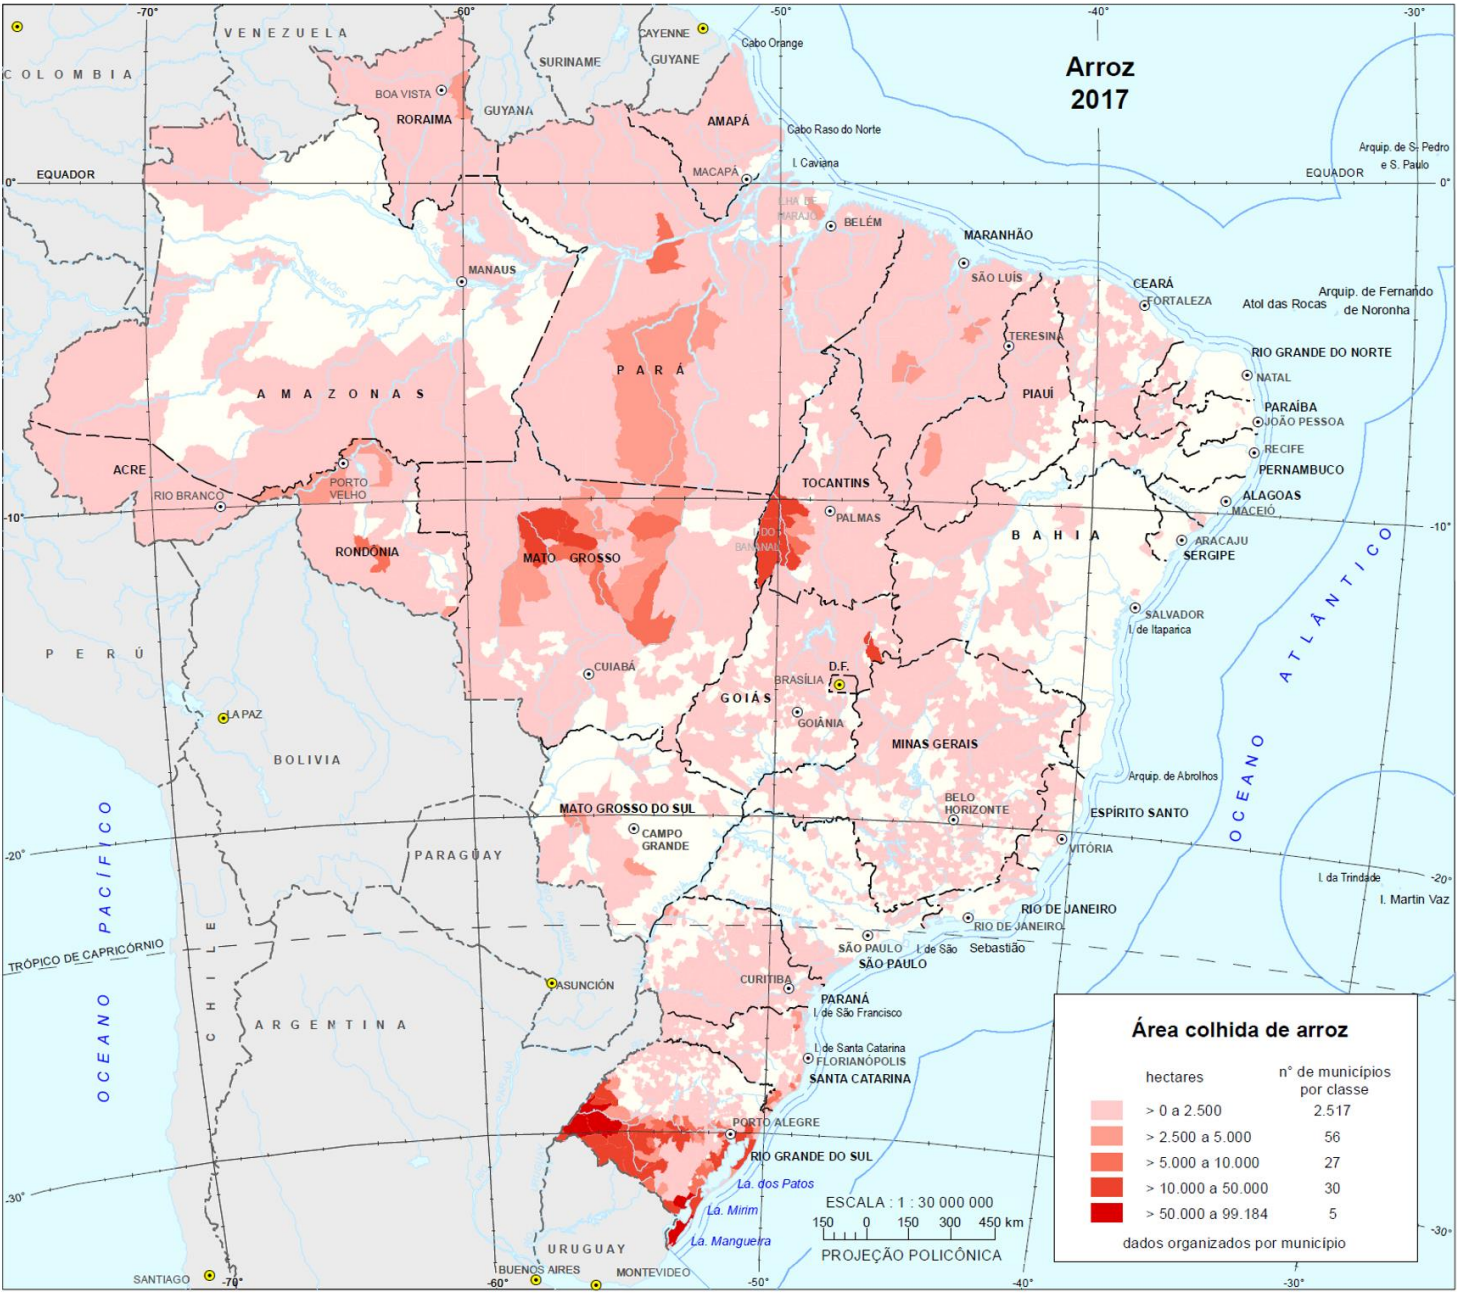

Figure S15. Rice production (adapted from IBGE, 2019).

**CLASSE:**

**JUSTIFICATIVA:**

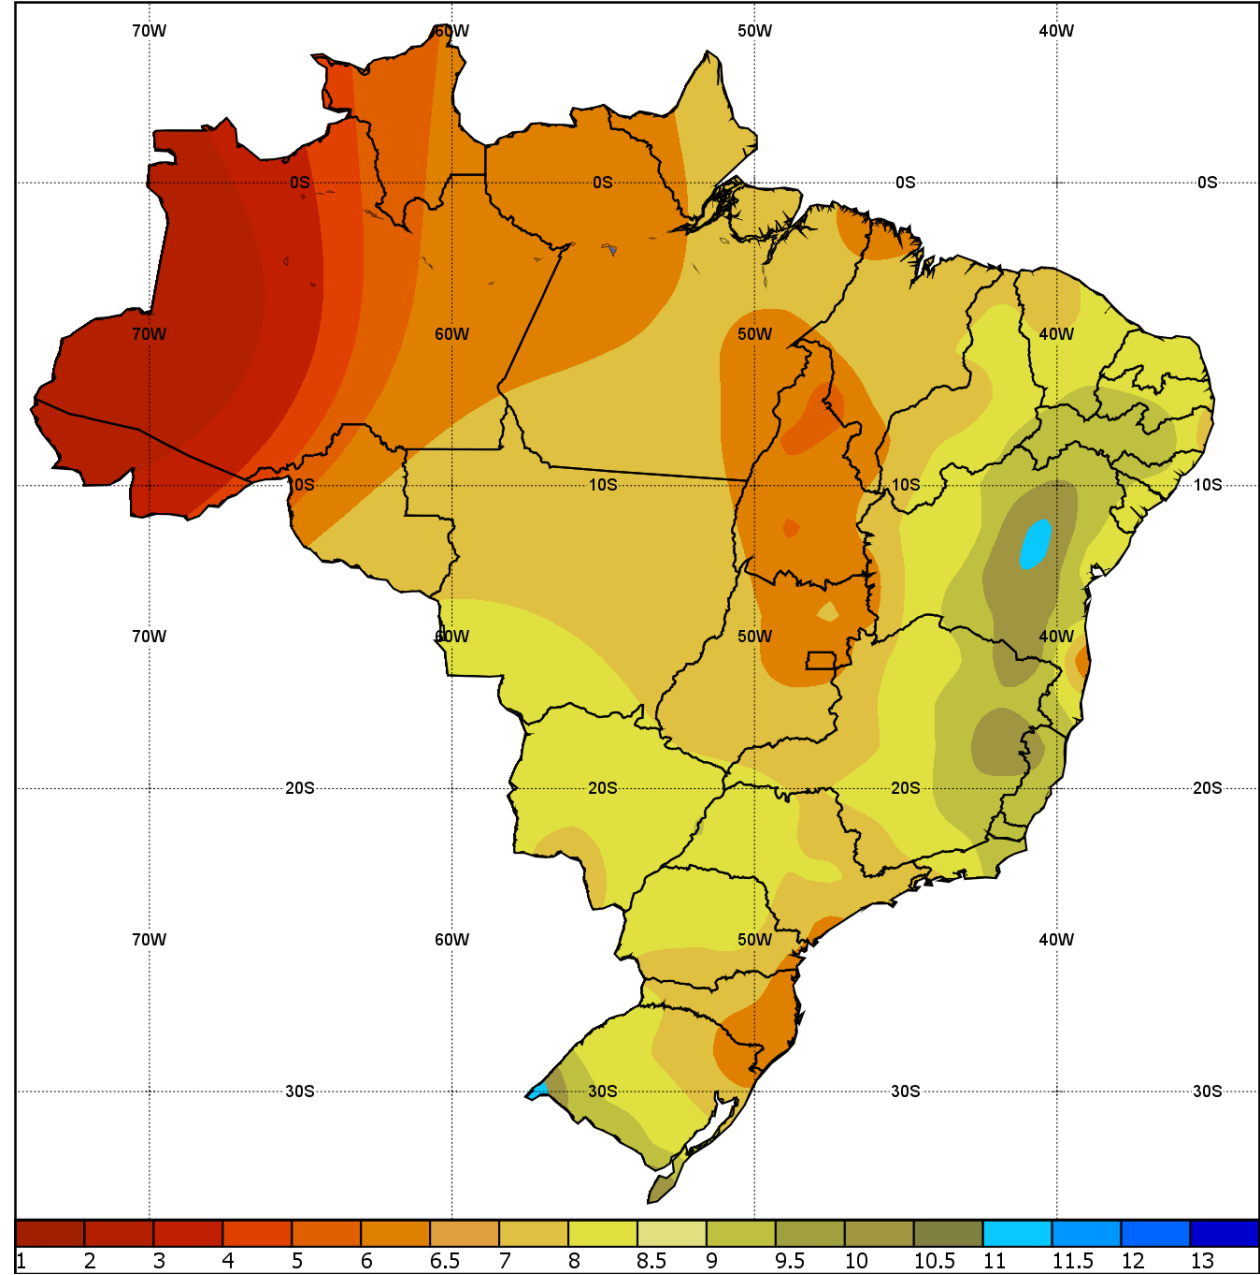

Figure S16. Number of dry spells longer than 9 days for the period of 1981-2010 (adapted from INMET, 2020).



## References:

Planos de Recursos Hídricos: <https://portal1.snirh.gov.br/ana/apps/webappviewer/index.html?id=29ef3cf04a584c0da35cf267ae69d0ea>, last access: 20 May 2020.

Brasil: Sistema Nacional de Informações sobre Saneamento: Diagnóstico dos Serviços de Água e Esgotos – 2017, Ministério do Desenvolvimento Regional. Secretaria Nacional de Saneamento – SNS, Brasília, DF, 2017.

Debortoli, N. S., Camarinha, P. I. M., Marengo, J. A., and Rodrigues, R. R.: An index of Brazil's vulnerability to expected increases in natural flash flooding and landslide disasters in the context of climate change, *Nat Hazards*, 86, 557–582, <https://doi.org/10.1007/s11069-016-2705-2>, 2017.

IBGE: Perfil dos municípios brasileiros: 2017, Instituto Brasileiro de Geografia e Estatística (IBGE) Coordenação de População e Indicadores Sociais, Rio de Janeiro, 2017.

IBGE: Censo agropecuário: resultados definitivos 2017, Instituto Brasileiro de Geografia e Estatística (IBGE), Rio de Janeiro, 2019.

Normais climatológicas do Brasil: <http://www.inmet.gov.br/portal/index.php?r=clima/normaisClimatologicas>, last access: 20 May 2020.

MMA: Índice de vulnerabilidade aos desastres naturais relacionados às secas no contexto da mudança do clima, Ministério do Meio Ambiente, Ministério da Integração Nacional, WWF-Brasil, Brasília, DF, 2017.

Théry, H. and Mello, N. A.: Atlas do Brasil disparidades e dinâmicas do território, 3rd ed., Editora da Universidade de São Paulo (USP), São Paulo, 392 pp., 2018.

Torres, R. R., Lapola, D. M., Marengo, J. A., and Lombardo, M. A.: Socio-climatic hotspots in Brazil, 115, 597–609, <https://doi.org/10.1007/s10584-012-0461-1>, 2012.
