# Supplementary material for: Teaching climate risk: a pilot training for tertiary students and practitioners in Brazil
Source: Copernicus journal article supplement (doi:10.5194/gc-2021-23), 2021-08-25
Supplement: Supplementary file 4 [file gc-2021-23-supplement.zip]

Archive with 5 entries (4 files):
- Supplement_gc-2021-23/
- Supplement_gc-2021-23/Supplement 1 – Slide show presentation.pdf
- Supplement_gc-2021-23/Supplement 2 – Set of maps.pdf
- Supplement_gc-2021-23/Supplement 3 – Script for facilitators.pdf
- Supplement_gc-2021-23/Supplement_title_page_gc-2021-23.pdf
